# Supplementary figures and images for: Real-time microfluidic recombinase polymerase amplification for the toxin B gene of Clostridium difficile on a SlipChip platform
Source: Royal Society of Chemistry journal article supplement (doi:10.1039/c4an01683a), 2014-10-23

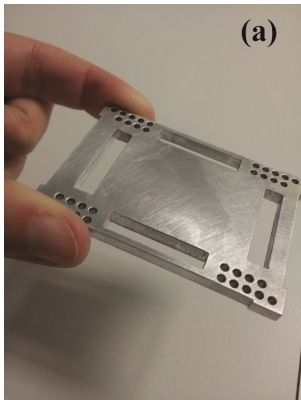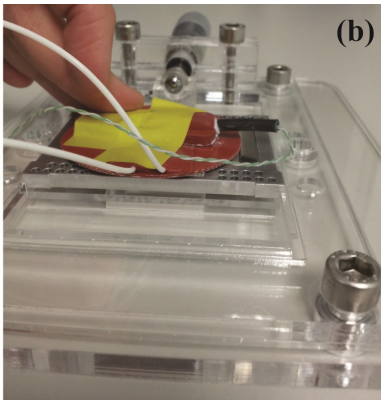

Supplement: c4an01683a4.pdf [file c4an01683a4.pdf]
